# Supplementary material for: Safety and efficacy of immune checkpoint inhibitor cancer therapy in patients with preexisting type 1 diabetes mellitus
Source: PubMed Central journal article supplement (PMC10643762; doi:10.3389/fendo.2023.1242830), 2023-10-31
Supplement: Table_1.pdf [file Table_1.pdf]

**Hilder et al.**  
**Supplemental Materials**

|              | Subjects with cancer who received ICI treatment | Subjects with any ICD code for T1DM | Defined cases with pre-existing T1DM after manual chart review |
|--------------|-------------------------------------------------|-------------------------------------|----------------------------------------------------------------|
| UCLA         | 3,130                                           | 45                                  | 3                                                              |
| USC          | 1,578                                           | 3                                   | 1                                                              |
| COH          | 4,545                                           | 13                                  | 2                                                              |
| UCSF         | 2,889                                           | 76                                  | 5                                                              |
| <b>Total</b> | <b>12,124</b>                                   | <b>137</b>                          | <b>11</b>                                                      |

**Supplemental Table 1.** Summary of T1DM case identification from each participating site. UCLA, University of California, Los Angeles Health System; USC, University of Southern California Keck Medical Center and Los Angeles County General Medical Center; COH, City of Hope Comprehensive Cancer Center; UCSF, University of California, San Francisco Health System; ICI, immune checkpoint inhibitor therapy; T1DM, type 1 diabetes mellitus; ICD, International Classification of Diseases.

| Case | Sex | Age at Cancer Diagnosis | Pre-Existing Autoimmune Disease | Cancer               | Metastases                  | ICI Line of Therapy | ICI Regimen   | Tumor Response | IRAE Type                   | IRAE Grade | IRAE Treatment          | Immunotherapy Cessation |
|------|-----|-------------------------|---------------------------------|----------------------|-----------------------------|---------------------|---------------|----------------|-----------------------------|------------|-------------------------|-------------------------|
| 1    | M   | 78                      | T1DM                            | Squamous Cell Lung   | Liver, Biliary              | 2                   | Durvalumab    | CR             | Hepatitis, Myositis         | 3          | Steroids, IVIG          | Yes                     |
| 2    | F   | 37                      | T1DM                            | Lung Adeno-carcinoma | Lung, Brain                 | 1                   | Pembrolizumab | PR             | Hepatitis                   | 3          | Steroids, Mycophenolate | Yes                     |
| 3    | F   | 47                      | T1DM, Hashimoto's thyroiditis   | Renal Cell Carcinoma | Brain, Kidney, Liver, Lungs | 1                   | Nivolumab     | CR             | Myasthenia Gravis, Myositis | 3          | Steroids, IVIG          | Yes                     |

**Supplemental Table 2.** Summary of Grade 3 & 4 IRAEs and their outcomes reported in case subjects. IRAEs, immune related adverse events, ICI, immune checkpoint inhibitor. T1DM, type 1 diabetes mellitus; ICI, immune checkpoint inhibitor; CR, complete responses; PR, partial response; IVIG, intravenous immunoglobulin
